# Supplementary material
Source: Springer Nature journal article supplement (https://www.springermedizin.de/resource/supplementary/12936_2011_1853_MOESM2_ESM.pdf/9541860)

◇ Lower quartile    ◆ Upper quartile    □ Minimum    ■ Maximum    - Median

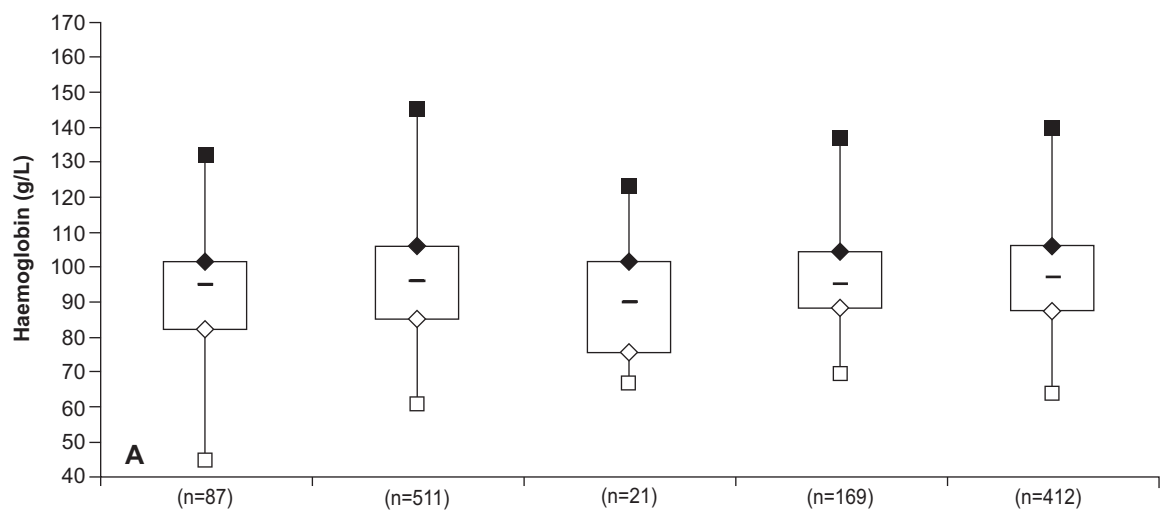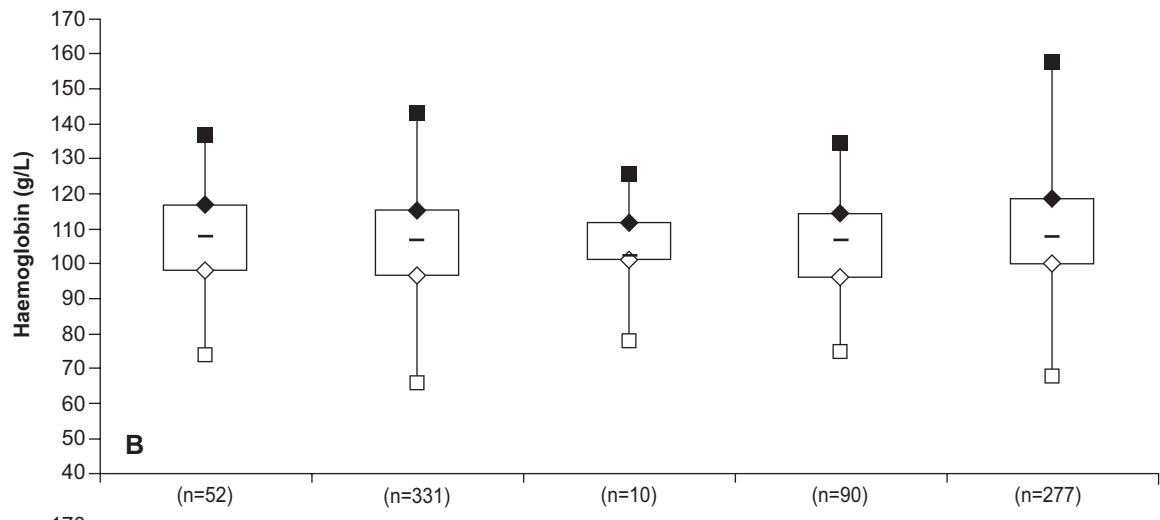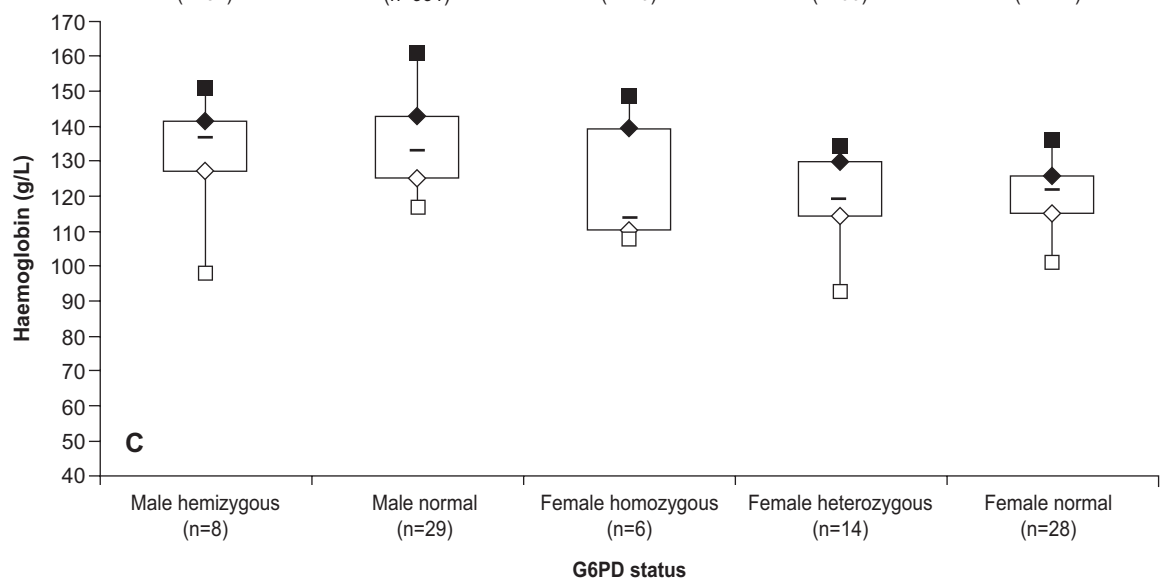

Supplement: MOESM2 [file 9541860]
